# Supplementary material
Source: PubMed Central journal article supplement (PMC2667563)
Supplement: NIHMS96659-supplement-supplement_1.pdf [file NIHMS96659-supplement-supplement_1.pdf]

Table S1. Odds Ratios and 95%CI for DNA repair SNPs and risk of glioblastoma by center, Glioblastoma Collaborative Group, 2008.

| Gene SNP                    | Center | heterozygote    |               | homozygote      |              | p-int <sup>b</sup>       |
|-----------------------------|--------|-----------------|---------------|-----------------|--------------|--------------------------|
|                             |        | OR <sup>a</sup> | (95% CI)      | OR <sup>a</sup> | (95% CI)     |                          |
| <i>Base Excision Repair</i> |        |                 |               |                 |              |                          |
| <b>APEX1 rs1130409</b>      |        |                 |               |                 |              |                          |
|                             | MDA    | 1.47            | (0.95, 2.28)  | 1.25            | (0.75, 2.06) | p-int <sup>b</sup> =0.43 |
|                             | NCI    | 0.84            | (0.53, 1.31)  | 0.72            | (0.42, 1.25) |                          |
|                             | NIOSH  | 0.91            | (0.57, 1.44)  | 0.91            | (0.53, 1.57) |                          |
|                             | UCSF   | 1.15            | (0.88, 1.52)  | 1.09            | (0.77, 1.54) |                          |
| <b>OGG1 rs1052133</b>       |        |                 |               |                 |              |                          |
|                             | MDA    | 1.04            | (0.71, 1.51)  | 1.00            | (0.47, 2.16) | p-int=0.43               |
|                             | NCI    | 0.67            | (0.44, 1.03)  | 1.28            | (0.61, 2.70) |                          |
|                             | NIOSH  | 1.20            | (0.80, 1.82)  | 0.79            | (0.31, 1.98) |                          |
|                             | UCSF   | 0.96            | (0.75, 1.23)  | 0.74            | (0.42, 1.29) |                          |
| <b>PARP1 rs1136410</b>      |        |                 |               |                 |              |                          |
|                             | MDA    | 0.76            | (0.51, 1.12)  | 0.81            | (0.29, 2.28) | p-int=0.82               |
|                             | NCI    | 0.83            | (0.54, 1.26)  | 0.30            | (0.07, 1.38) |                          |
|                             | NIOSH  | 0.77            | (0.49, 1.20)  | 1.12            | (0.43, 2.95) |                          |
|                             | UCSF   | 0.77            | (0.59, 1.01)  | 0.92            | (0.39, 2.20) |                          |
| <b>XRCC1 rs25487</b>        |        |                 |               |                 |              |                          |
|                             | MDA    | 1.39            | (0.94, 2.04)  | 1.79            | (1.07, 3.01) | p-int=0.37               |
|                             | NCI    | 1.13            | (0.75, 1.69)  | 0.90            | (0.51, 1.59) |                          |
|                             | NIOSH  | 1.52            | (1.00, 2.33)  | 1.57            | (0.87, 2.83) |                          |
|                             | UCSF   | 0.95            | (0.74, 1.22)  | 1.03            | (0.70, 1.51) |                          |
| <b>XRCC1 rs1799782</b>      |        |                 |               |                 |              |                          |
|                             | MDA    | 0.89            | (0.53, 1.47)  | 0.45            | (0.04, 4.74) | p-int=0.94               |
|                             | NCI    | 0.95            | (0.57, 1.59)  | --              | --           |                          |
|                             | NIOSH  | 1.02            | (0.52, 2.01)  | --              | --           |                          |
|                             | UCSF   | 0.81            | (0.56, 1.18)  | 2.21            | (0.20, 24.6) |                          |
| <i>Direct Repair</i>        |        |                 |               |                 |              |                          |
| <b>MGMT rs12917</b>         |        |                 |               |                 |              |                          |
|                             | MDA    | 0.63            | (0.40, 0.98)  | 1.12            | (0.34, 3.72) | p-int=0.68               |
|                             | NCI    | 0.90            | (0.57, 1.410) | 1.50            | (0.48, 4.66) |                          |

*Non Homologous End Joining*  
**PRKDC** rs7003908

|       |      |              |      |              |            |
|-------|------|--------------|------|--------------|------------|
| NIOSH | 0.85 | (0.53, 1.36) | 0.68 | (0.14, 3.33) |            |
| UCSF  | 1.03 | (0.78, 1.38) | 1.39 | (0.51, 3.77) |            |
| MDA   | 0.96 | (0.66, 1.40) | 1.18 | (0.69, 2.03) | p-int=0.81 |
| NCI   | 0.91 | (0.60, 1.39) | 1.19 | (0.63, 2.24) |            |
| NIOSH | 1.09 | (0.71, 1.68) | 1.38 | (0.79, 2.42) |            |
| UCSF  | 1.18 | (0.91, 1.51) | 1.78 | (1.23, 2.59) |            |

*Nucleotide Excision Repair*

**ERCC1** rs3212986

|       |      |              |      |              |            |
|-------|------|--------------|------|--------------|------------|
| MDA   | 1.06 | (0.73, 1.55) | 1.39 | (0.65, 2.96) | p-int=0.18 |
| NCI   | 0.83 | (0.55, 1.26) | 0.44 | (0.14, 1.39) |            |
| NIOSH | 1.25 | (0.84, 1.87) | 0.65 | (0.24, 1.75) |            |
| UCSF  | 0.93 | (0.72, 1.19) | 1.4  | (0.85, 2.30) |            |

**ERCC2** rs13181

|       |      |              |      |              |            |
|-------|------|--------------|------|--------------|------------|
| MDA   | 1.24 | (0.85, 1.82) | 1.18 | (0.68, 2.05) | p-int=0.96 |
| NCI   | 1.19 | (0.79, 1.78) | 1.19 | (0.06, 2.12) |            |
| NIOSH | 1.31 | (0.86, 1.99) | 1.13 | (0.61, 2.10) |            |
| UCSF  | 1.08 | (0.84, 1.39) | 1.25 | (0.86, 1.81) |            |

**ERCC5** rs17655

|       |      |              |      |              |            |
|-------|------|--------------|------|--------------|------------|
| MDA   | 0.87 | (0.37, 2.04) | 0.69 | (0.30, 1.58) | p-int=0.82 |
| NCI   | 1.15 | (0.76, 1.72) | 1.08 | (0.49, 2.41) |            |
| NIOSH | 0.92 | (0.62, 1.39) | 1.03 | (0.48, 2.22) |            |
| UCSF  | 1.03 | (0.81, 1.33) | 0.89 | (0.51, 1.55) |            |

**GLTSCR1** rs1035938

|       |      |              |      |              |            |
|-------|------|--------------|------|--------------|------------|
| MDA   | 0.92 | (0.64, 1.34) | 1.04 | (0.55, 1.97) | p-int=0.53 |
| NCI   | 0.94 | (0.62, 1.41) | 1.09 | (0.50, 2.38) |            |
| NIOSH | 0.92 | (0.62, 1.39) | 1.03 | (0.48, 2.22) |            |
| UCSF  | 1.28 | (1.00, 1.64) | 1.53 | (0.98, 2.40) |            |

**RAD23B** rs1805329

|       |      |              |      |              |            |
|-------|------|--------------|------|--------------|------------|
| MDA   | 0.82 | (0.56, 1.21) | 0.56 | (0.22, 1.41) | p-int=0.33 |
| NCI   | 0.89 | (0.57, 1.39) | 0.59 | (0.21, 1.69) |            |
| NIOSH | 1.44 | (0.95, 2.18) | 0.53 | (0.15, 1.82) |            |
| UCSF  | 0.82 | (0.63, 1.07) | 0.91 | (0.51, 1.63) |            |

Odds Ratios and 95%CI for DNA repair SNPs and risk of glioblastoma by age of diagnosis

| SNP             | genotype | Age of diagnosis <50 years |              | Age of diagnosis 50+ years |              | p-trend       |
|-----------------|----------|----------------------------|--------------|----------------------------|--------------|---------------|
|                 |          | OR                         | 95%CI        | OR                         | 95%CI        |               |
| PARP1 rs1136410 | TT       | Ref                        |              | Ref                        |              |               |
|                 | CT       | 0.93                       | (0.68, 1.27) | 0.72                       | (0.57, 0.89) |               |
|                 | CC       | 1.20                       | (0.56, 2.55) | 0.59                       | (0.29, 1.17) | p-trend=0.001 |
| PRKDC rs7003908 | TT       | Ref                        |              | Ref                        |              |               |
|                 | GT       | 1.04                       | (0.77, 1.40) | 1.11                       | (0.90, 1.38) |               |
|                 | GG       | 1.45                       | (0.97, 2.18) | 1.46                       | (1.07, 1.99) | p-trend=0.02  |
| ERCC2 rs13181   | AA       | Ref                        |              | Ref                        |              |               |
|                 | AC       | 1.17                       | (0.87, 1.56) | 1.19                       | (0.96, 1.47) |               |
|                 | CC       | 0.92                       | (0.58, 1.45) | 1.36                       | (1.01, 1.84) | p-trend=0.03  |

<sup>a</sup>adjusted for age, gender and study center.

<sup>b</sup>p-interaction is the interaction for snp and center.
